# Supplementary material for: Genome-Wide Association Study for Autism Spectrum Disorder in Taiwanese Han Population
Source: PubMed Central journal article supplement (PMC4580585; doi:10.1371/journal.pone.0138695), 2015-09-23
Supplement: pone.0138695.s001.pdf [file pone.0138695.s001.pdf]

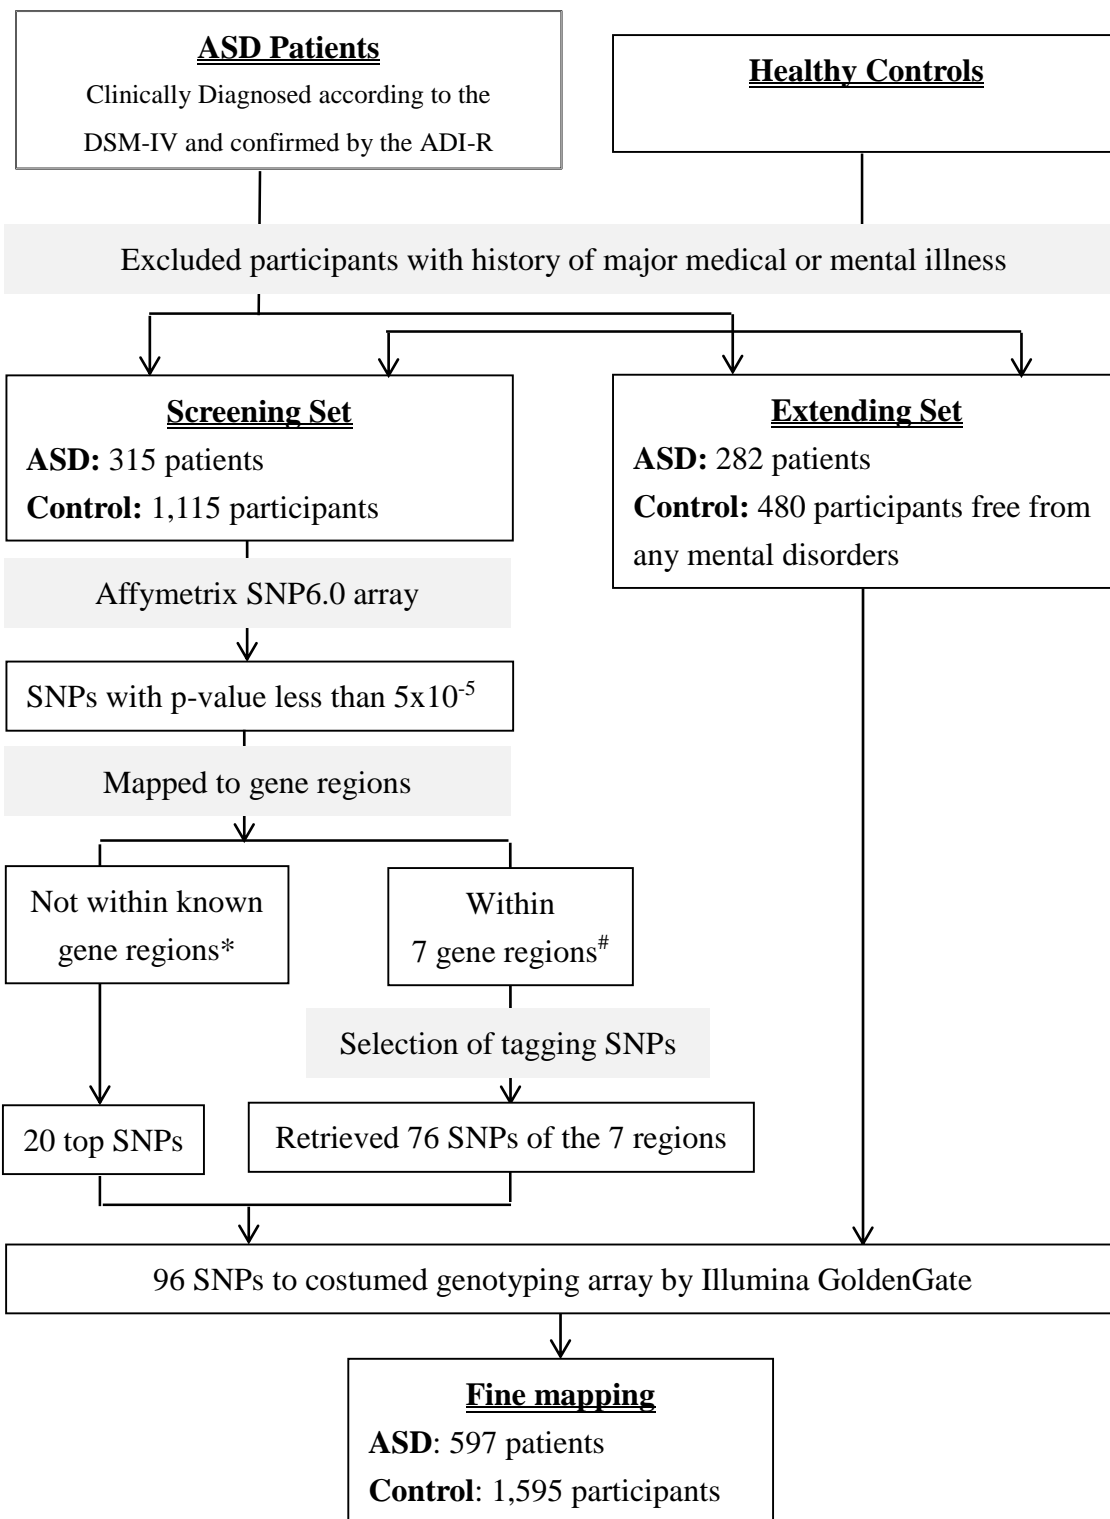

### Supplementary Figure 1. Study design flow diagram

**Abbreviation: DSM-IV:** The Diagnostic and Statistical Manual of Mental Disorders, Fourth edition; **ADI-R:** The Autism Diagnostic Interview-Revised; **ASD:** autism spectrum disorder.

# Including *OR2M3-OR2T5*, *STYK1*, *GSTZ1*, *GLIPR1-KRR1*, *DDX19A-DDX19B*, *SGSM2-MNT*, *KCNE1*.

\* One marker of a previously reported autism associated gene (*MACROD2*) with a p-value of  $9.95 \times 10^{-5}$  was also included.
